# Supplementary material for: Exploring the efficacy of psychological treatments for depression: a multiverse meta-analysis protocol
Source: HighWire-hosted journal article supplement (doi:10.1136/bmjopen-2021-050197), 2022-01-01
Supplement: bmjopen-2021-050197supp002_data_supplement.pdf [file bmjopen-2021-050197supp002_data_supplement.pdf]

**Search strings for four bibliographical databases.****PubMed**

Psychotherapy [MH] OR psychotherap\*[All Fields] OR cbt[All Fields] OR "behavior therapies"[All Fields] OR "behavior therapy"[All Fields] OR "behavior therapeutic"[All Fields] OR "behavior therapeutical"[All Fields] OR "behavior therapeutics"[All Fields] OR "behavior therapist"[All Fields] OR "behavior therapists"[All Fields] OR "behavior treatment"[All Fields] OR "behavior treatments"[All Fields] OR "behaviors therapies"[All Fields] OR "behaviors therapy"[All Fields] OR "behaviors therapeutics"[All Fields] OR "behaviors therapeutic"[All Fields] OR "behaviors therapeutical"[All Fields] OR "behaviors therapist"[All Fields] OR "behaviors therapists"[All Fields] OR "behaviors treatment"[All Fields] OR "behaviors treatments"[All Fields] OR "behavioral therapies"[All Fields] OR "behavioral therapy"[All Fields] OR "behavioral therapeutics"[All Fields] OR "behavioral therapeutic"[All Fields] OR "behavioral therapeutical"[All Fields] OR "behavioral therapist"[All Fields] OR "behavioral therapists"[All Fields] OR "behavioral treatment"[All Fields] OR "behavioral treatments"[All Fields] OR "behaviour therapies"[All Fields] OR "behaviour therapy"[All Fields] OR "behaviour therapeutic"[All Fields] OR "behaviour therapeutical"[All Fields] OR "behaviour therapeutics"[All Fields] OR "behaviour therapist"[All Fields] OR "behaviour therapists"[All Fields] OR "behaviour treatment"[All Fields] OR "behaviour treatments"[All Fields] OR "behaviours therapies"[All Fields] OR "behaviours therapy"[All Fields] OR "behaviours therapeutics"[All Fields] OR "behaviours therapeutic"[All Fields] OR "behaviours therapeutical"[All Fields] OR "behaviours therapist"[All Fields] OR "behaviours therapists"[All Fields] OR "behaviours treatment"[All Fields] OR "behaviours treatments"[All Fields] OR "behavioural therapies"[All Fields] OR "behavioural therapy"[All Fields] OR "behavioural therapeutics"[All Fields] OR "behavioural therapeutic"[All Fields] OR "behavioural therapeutical"[All Fields] OR "behavioural therapist"[All Fields] OR "behavioural therapists"[All Fields] OR "behavioural treatment"[All Fields] OR "behavioural treatments"[All Fields] OR "cognition therapies"[All Fields] OR "cognition therapie"[All Fields] OR "cognition therapy"[All Fields] OR "cognition therapeutical"[All Fields] OR "cognition therapeutic"[All Fields] OR "cognition therapeutics"[All Fields] OR "cognition therapist"[All Fields] OR "cognition therapists"[All Fields] OR "cognition treatment"[All Fields] OR "cognition treatments"[All Fields] OR psychodynamic[All Fields] OR Psychoanalysis[MH] OR psychoanalysis[All Fields] OR psychoanalytic\*[All Fields] OR counselling[All Fields] OR counseling[All Fields] OR Counseling[MH] OR "problem-solving"[All Fields] OR mindfulness[All Fields] OR (acceptance[All Fields] AND commitment[All Fields] ) OR "assertiveness training"[All Fields] OR "behavior activation"[All Fields] OR "behaviors activation"[All Fields] OR "behavioral activation"[All Fields] OR "cognitive therapies"[All Fields] OR "cognitive therapy"[All Fields] OR "cognitive therapeutic"[All Fields] OR "cognitive therapeutics"[All Fields] OR "cognitive therapeutical"[All Fields] OR "cognitive therapist"[All Fields] OR "cognitive therapists"[All Fields] OR "cognitive treatment"[All Fields] OR "cognitive treatments"[All Fields] OR "cognitive restructuring"[All Fields] OR ("compassion-focused"[All Fields] OR "compassion-focussed"[All Fields]) AND (therapy[SH] OR therapies[All Fields] OR therapy[All Fields] OR therape\*[All Fields] OR therapis\*[All Fields] OR Therapeutics [OR treatment\*[All Fields]]) OR ((therapy[SH] OR therapies[All Fields] OR therapy [All Fields] OR therape\*[All Fields] OR therapis\*[All Fields] OR Therapeutics[MH] OR treatment\*[All Fields]) AND constructivist\*[All Fields]) OR "metacognitive therapies"[All

Fields] OR "metacognitive therapy"[All Fields] OR "metacognitive therapeutic"[All Fields] OR "metacognitive therapeutics"[All Fields] OR "metacognitive therapeutical"[All Fields] OR "metacognitive therapist"[All Fields] OR "metacognitive therapists"[All Fields] OR "metacognitive treatment"[All Fields] OR "metacognitive treatments"[All Fields] OR "metacognitive therapies"[All Fields] OR "meta-cognitive therapy"[All Fields] OR "meta-cognitive therapeutic"[All Fields] OR "meta-cognitive therapeutics"[All Fields] OR "meta-cognitive therapeutical"[All Fields] OR "meta-cognitive therapist"[All Fields] OR "meta-cognitive therapists"[All Fields] OR "meta-cognitive treatment"[All Fields] OR "meta-cognitive treatments"[All Fields] OR "solution-focused therapies"[All Fields] OR "solution-focused therapy"[All Fields] OR "solution-focused therapeutic"[All Fields] OR "solution-focused therapeutics"[All Fields] OR "solution-focused therapeutical"[All Fields] OR "solution focused therapies"[All Fields] OR "solution focused therapy"[All Fields] OR "solution focused therapeutic"[All Fields] OR "solution focused therapeutics"[All Fields] OR "solution focused therapeutical"[All Fields] OR "solution-focussed therapies"[All Fields] OR "solution-focussed therapy"[All Fields] OR "solution-focussed therapeutic"[All Fields] OR "solution-focussed therapeutics"[All Fields] OR "solution-focussed therapeutical"[All Fields] OR "solution focussed therapies"[All Fields] OR "solution focussed therapy"[All Fields] OR "solution focussed therapeutic"[All Fields] OR "solution focussed therapeutics"[All Fields] OR "solution focussed therapeutical"[All Fields] OR "self-control therapies"[All Fields] OR "self-control therapy"[All Fields] OR "self-control therapeutics"[All Fields] OR "self-control therapeutical"[All Fields] OR "self-control therapeutic"[All Fields] OR "self-control training"[All Fields] OR "self-control trainings"[All Fields] OR "self control therapies"[All Fields] OR "self control therapy"[All Fields] OR "self control therapeutics"[All Fields] OR "self control therapeutical"[All Fields] OR "self control therapeutic"[All Fields] OR "self control training"[All Fields] OR "self control trainings"[All Fields]

AND

(Depressive Disorder[MH] OR Depression[MH] OR dysthymi\*[All Fields] OR "affective disorder"[All Fields] OR "affective disorders"[All Fields] OR "mood disorder"[All Fields] OR "mood disorders"[All Fields] OR depression\*[All Fields] OR depressive\*[All Fields] OR "dysthymic disorder"[MeSH Terms])

Limits: RCTs

## Embase

#1

'psychotherapy'/exp OR 'psychotherapy' OR 'psychotherapies' OR 'psychotherapeutics' OR 'psychotherapeutical' OR 'cognitive therapy'/exp OR 'cognitive behavior therapy'/exp OR 'behavior therapy'/exp OR 'cbt' OR 'cognitive behavioural therapy' OR 'cognitive behavioural therapies' OR 'cognitive behavioral therapy' OR 'cognitive behavioral therapies' OR 'behavior therapy' OR 'behavior therapies' OR 'behaviour therapy' OR 'behaviour therapies' OR 'cognition therapy' OR 'cognitive therapies' OR 'cognitive therapy' OR 'cognitive therapeutic' OR 'cognitive therapeutics' OR 'cognitive therapeutical' OR 'cognitive therapist' OR 'cognitive therapists' OR 'cognitive treatment' OR 'cognitive treatments' OR 'cognitive restructuring' OR 'cognition therapies' OR 'cognition therapie' OR 'cognition therapeutical' OR 'cognition therapeutic' OR 'cognition therapeutics' OR 'cognition therapist' OR 'cognition therapists' OR 'cognition treatment' OR 'cognition treatments' OR 'behavior therapeutic' OR 'behavior therapeutical' OR 'behavior therapeutics' OR 'behavior

therapist' OR 'behavior therapists' OR 'behavior treatment' OR 'behavior treatments'  
OR 'behaviors therapies' OR 'behaviors therapy' OR 'behaviors therapeutics' OR 'behaviors  
therapeutic' OR 'behaviors therapeutical' OR 'behaviors therapist' OR 'behaviors  
therapists' OR 'behaviors treatment' OR 'behaviors treatments' OR 'behavioral therapies'  
OR 'behavioral therapy' OR 'behavioral therapeutics' OR 'behavioral therapeutic' OR  
'behavioral therapeutical' OR 'behavioral therapist' OR 'behavioral therapists' OR  
'behavioral treatment' OR 'behavioral treatments' OR 'behaviour therapeutic' OR 'behaviour  
therapeutical' OR 'behaviour therapeutics' OR 'behaviour therapist' OR 'behaviour  
therapists' OR 'behaviour treatment' OR 'behaviour treatments' OR 'behaviours  
therapies' OR 'behaviours therapy' OR 'behaviours therapeutics' OR 'behaviours therapeutic'  
OR 'behaviours therapeutical' OR 'behaviours therapist' OR 'behaviours therapists' OR  
'behaviours treatment' OR 'behaviours treatments' OR 'behavioural therapies' OR  
'behavioural therapy' OR 'behavioural therapeutics' OR 'behavioural therapeutic' OR  
'behavioural therapeutical' OR 'behavioural therapist' OR 'behavioural therapists' OR  
'behavioural treatment' OR 'behavioural treatments' OR 'behavior activation' OR 'behaviors  
activation' OR 'behavioral activation' OR 'behaviour activation' OR 'behaviours activation'  
OR 'behavioural activation' OR 'psychoanalytic therapy'/exp OR 'psychodynamic' OR  
'psychodynamical' OR 'psychoanalysis' OR 'psychoanalytical' OR 'counselling'/exp OR  
'counseling'/exp OR 'counselling' OR 'counseling' OR 'problem-solving' OR 'problem solving'  
OR 'supportive therapy' OR 'metacognitive therapy' OR 'metacognitive therapies' OR  
'metacognitive therapeutic' OR 'metacognitive therapeutics' OR 'metacognitive  
therapeutical' OR 'metacognitive therapist' OR 'metacognitive therapists' OR  
'metacognitive treatment' OR 'metacognitive treatments' OR 'meta-cognitive therapy' OR  
'meta-cognitive therapies' OR 'meta-cognitive therapeutic' OR 'meta-cognitive therapeutics'  
OR 'meta-cognitive therapeutical' OR 'meta-cognitive therapist' OR 'meta-cognitive  
therapists' OR 'meta-cognitive treatment' OR 'meta-cognitive treatments' OR 'solution-  
focused therapies' OR 'solution focused therapies' OR 'solution-focussed therapies' OR  
'solution focused therapies' OR 'solution- focused therapy' OR 'solution focused therapy' OR  
'solution-focussed therapy' OR 'solution focused therapy' OR 'solution-focused therapeutic'  
OR 'solution focused therapeutic' OR 'solution-focussed therapeutic' OR 'solution focussed  
therapeutic' OR 'solution-focused therapeutics' OR 'solution focused therapeutics' OR  
'solution-focussed therapeutics' OR 'solution focused therapeutics' OR 'solution-focused  
therapeutical' OR 'solution focused therapeutical' OR 'solution-focussed therapeutical' OR  
'solution focused therapeutical' OR 'self-control therapies' OR 'self control therapies' OR  
'self-control therapy' OR 'self control therapy' OR 'self-control therapeutics' OR 'self control  
therapeutics' OR 'self-control therapeutical' OR 'self control therapeutical' OR 'self-control  
therapeutic' OR 'self control therapeutic' OR 'self-control training' OR 'self control training'  
OR 'self control trainings' OR 'self-control trainings' OR 'mindfulness' OR 'acceptance  
commitment' OR 'acceptance and commitment' OR 'assertiveness training'

#2

'compassion-focused' OR 'compassion-focussed' OR 'compassion focused' OR 'compassion  
focussed' OR 'constructivist' OR 'constructivists'

#3

'therapies' OR 'therapy' OR 'therapeutics' OR 'therapist' OR 'treatment' OR 'treatments'

#4

Combine: #2 AND #3

#5: #1 OR #4

#6

'depressive disorder'/exp OR 'depression'/exp OR 'depressive' OR 'major depression'/exp OR 'major depressive disorder'/exp OR 'depression' OR 'depressions' OR 'depressive' OR 'dysthymic disorder'/exp OR 'dysthymic disorder' OR 'dysthymia'/exp OR 'dysthymic' OR 'mood disorder'/exp OR 'affective disorder'/exp OR 'affective disorder' OR 'affective disorders' OR 'mood disorder' OR 'mood disorders'

Combine: #5 AND #6

Limits: RCTs

**PsycINFO**

(DE "Psychotherapy" OR "Psychotherapy" OR "psychotherapies" OR "psychotherapeutic" OR "psychotherapeutical" OR "psychotherapeutics" OR DE "Behavior Therapy" OR DE "Cognitive Behavior Therapy" OR "CBT" OR "behavior therapies" OR "behavior therapy" OR "behavior therapeutic" OR "behavior therapeutical" OR "behavior therapeutics" OR "behavior therapist" OR "behavior therapists" OR "behavior treatment" OR "behavior treatments" OR "behaviors therapies" OR "behaviors therapy" OR "behaviors therapeutics" OR "behaviors therapeutic" OR "behaviors therapeutical" OR "behaviors therapist" OR "behaviors therapists" OR "behaviors treatment" OR "behaviors treatments" OR "behavioral therapies" OR "behavioral therapy" OR "behavioral therapeutics" OR "behavioral therapeutic" OR "behavioral therapeutical" OR "behavioral therapist" OR "behavioral therapists" OR "behavioral treatment" OR "behavioral treatments" OR "behaviour therapies" OR "behaviour therapy" OR "behaviour therapeutic" OR "behaviour therapeutical" OR "behaviour therapeutics" OR "behaviour therapist" OR "behaviour therapists" OR "behaviour treatment" OR "behaviour treatments" OR "behaviours therapies" OR "behaviours therapy" OR "behaviours therapeutics" OR "behaviours therapeutic" OR "behaviours therapeutical" OR "behaviours therapist" OR "behaviours therapists" OR "behaviours treatment" OR "behaviours treatments" OR "behavioural therapies" OR "behavioural therapy" OR "behavioural therapeutics" OR "behavioural therapeutic" OR "behavioural therapeutical" OR "behavioural therapist" OR "behavioural therapists" OR "behavioural treatment" OR "behavioural treatments" OR "cognition therapies" OR "cognition therapie" OR "cognition therapy" OR "cognition therapeutical" OR "cognition therapeutic" OR "cognition therapeutics" OR "cognition therapist" OR "cognition therapists" OR "cognition treatment" OR "cognition treatments" OR "cognitive therapies" OR "cognitive therapy" OR "cognitive therapeutic" OR "cognitive therapeutics" OR "cognitive therapeutical" OR "cognitive therapist" OR "cognitive therapists" OR "cognitive treatment" OR "cognitive treatments" OR "cognitive restructuring" OR DE "Emotion Focused Therapy" OR DE "Psychoanalysis" OR "psychoanalysis" OR "psychoanalytic" OR "psychoanalytical" OR DE "Psychodynamic Psychotherapy" OR "psychodynamic" OR DE "Psychotherapeutic Counseling" OR "counselling" OR "counseling" OR "problem-solving" OR "problem solving" OR "mindfulness" OR ("acceptance" AND "commitment") OR "assertiveness training" OR "behavior activation" OR "behaviors activation" OR "behavioral activation" OR "behaviour activation" OR "behaviours activation" OR "behavioural activation" OR "metacognitive therapies" OR "metacognitive therapy" OR "metacognitive therapeutic" OR "metacognitive therapeutics" OR "metacognitive therapeutical" OR "metacognitive therapist" OR "metacognitive therapists" OR "metacognitive treatment" OR "metacognitive treatments" OR "meta-cognitive therapies" OR "meta-cognitive therapy" OR "meta-

cognitive therapeutic" OR "meta-cognitive therapeutics" OR "meta-cognitive therapeutical" OR "meta-cognitive therapist" OR "meta-cognitive therapists" OR "meta-cognitive treatment" OR "meta-cognitive treatments" OR DE "Solution Focused Therapy" OR "solution- focused therapies" OR "solution-focused therapy" OR "solution-focused therapeutic" OR "solution-focused therapeutics" OR "solution-focused therapeutical" OR "solution-focussed therapies" OR "solution-focussed therapy" OR "solution-focussed therapeutic" OR "solution-focussed therapeutics" OR "solution-focussed therapeutical" OR "solution focused therapies" OR "solution focused therapy" OR "solution focused therapeutic" OR "solution focused therapeutics" OR "solution focused therapeutical" OR "solution focussed therapies" OR "solution focussed therapy" OR "solution focussed therapeutic" OR "solution focussed therapeutics" OR "solution focussed therapeutical" OR "self- control therapies" OR "self-control therapy" OR "self-control therapeutics" OR "self-control therapeutical" OR "self- control therapeutic" OR "self-control training" OR "self-control trainings" OR "self control therapies" OR "self control therapy" OR "self control therapeutics" OR "self control therapeutical" OR "self control therapeutic" OR "self control training" OR "self control trainings" OR (("compassion-focused" OR "compassion-focussed" OR "compassion focused" OR "compassion focussed") AND ("therapies" OR "therapy" OR "therapie" OR "therapist" OR "therapists" OR "therapeut" OR "treatment" OR "treatments")) OR ("constructivist" AND ("therapies" OR "therapy" OR "therapie" OR "therapist" OR "therapists" OR "therapeut" OR "treatment" OR "treatments")))

AND

(DE "Depression (Emotion)" "depressive disorder" OR "depression" OR "depressions" OR "depressive" OR DE "Major Depression" OR "major depression" OR "major depressive disorder" OR DE "Dysthymic Disorder" OR "Dysthymia" OR " dysthymic disorder" OR DE "Affective Disorders" OR "Affective Disorder" OR "affective disorders" OR "Mood Disorder" OR "Mood disorders")

Limits: Methodology is ME=(treatment outcome/clinical trial): papers (December 2014)

### Cochrane

#1 MeSH descriptor: [Depressive Disorder] explode all trees : 6, 777

#2 "depress\*" (Word variations have been searched) : 51, 768

#3 #1or#2 :51,783

#4 "major depressive disorder" (Word variations have been searched) : 5, 435

#5 #3or#4 :51,783

#6 MeSH descriptor: [Dysthymic Disorder] explode all trees : 129

#7 "dysthymi\*" (Word variations have been searched) : 649

#8 #6or#7 :649

#9 #5or#8 :51,800

#10 "mood disorder" (Word variations have been searched) :4, 034

#11 "affective disorder" (Word variations have been searched) : 2, 882

#12 #10or#11:6,055

#13 #9or#12:53,227

#14 MeSH descriptor: [Psychotherapy] explode all trees : 13, 568

#15 "psychotherap\*" (Word variations have been searched) : 7, 758

#16 "CBT" (Word variations have been searched) : 2, 029

#17 "Cognitive Behav\* therap\*" (Word variations have been searched) : 8, 893

#18 #14or#15or#16or#17 :20,795

- #19 'psychodynamic' (Word variations have been searched) : 469
- #20 MeSH descriptor: [Psychoanalysis] explode all trees : 13
- #21 "psychoanaly\*" (Word variations have been searched) : 345
- #22 MeSH descriptor: [Counseling] explode all trees : 2, 783
- #23 "counseling\*" (Word variations have been searched) : 6, 913
- #24 "problem solving" (Word variations have been searched) : 2, 867
- #25 #18or#19or#20or#21or#22or#23or#24 :28,149
- #26 "acceptance commitment" (Word variations have been searched) : 168
- #27 "assertiveness training" (Word variations have been searched) :231
- #28 "behavior activation" (Word variations have been searched) : 663
- #29 "mindfulness" (Word variations have been searched) : 466
- #30 "metacognitive therap\*" (Word variations have been searched) :56
- #31 "solution focused therap\*" (Word variations have been searched) :858
- #32 "self control training" (Word variations have been searched): 5850
- #33 #25or#26or#27or#28or#29or#30or#31or#32 :32,748
- #34 "Randomized Controlled Trial":ti,ab,kw (Word variations have been searched) : 120, 901
- #35 #13 and #33 and #34 in Trials: 4,614
